# Supplementary material for: Affibody-Derived Drug Conjugates Targeting HER2: Effect of Drug Load on Cytotoxicity and Biodistribution
Source: PubMed Central journal article supplement (PMC8005000; doi:10.3390/pharmaceutics13030430), 2021-03-23
Supplement: pharmaceutics-13-00430-s001.pdf [file pharmaceutics-13-00430-s001.pdf]

# Supplementary Materials: Affibody-Derived Drug Conjugates Targeting HER2: Effect of Drug Load on Cytotoxicity and Biodistribution

Haozhong Ding, Tianqi Xu, Jie Zhang, Vladimir Tolmachev, Maryam Oroujeni, Anna Orlova, Torbjörn Gräslund and Anzhelika Vorobyeva

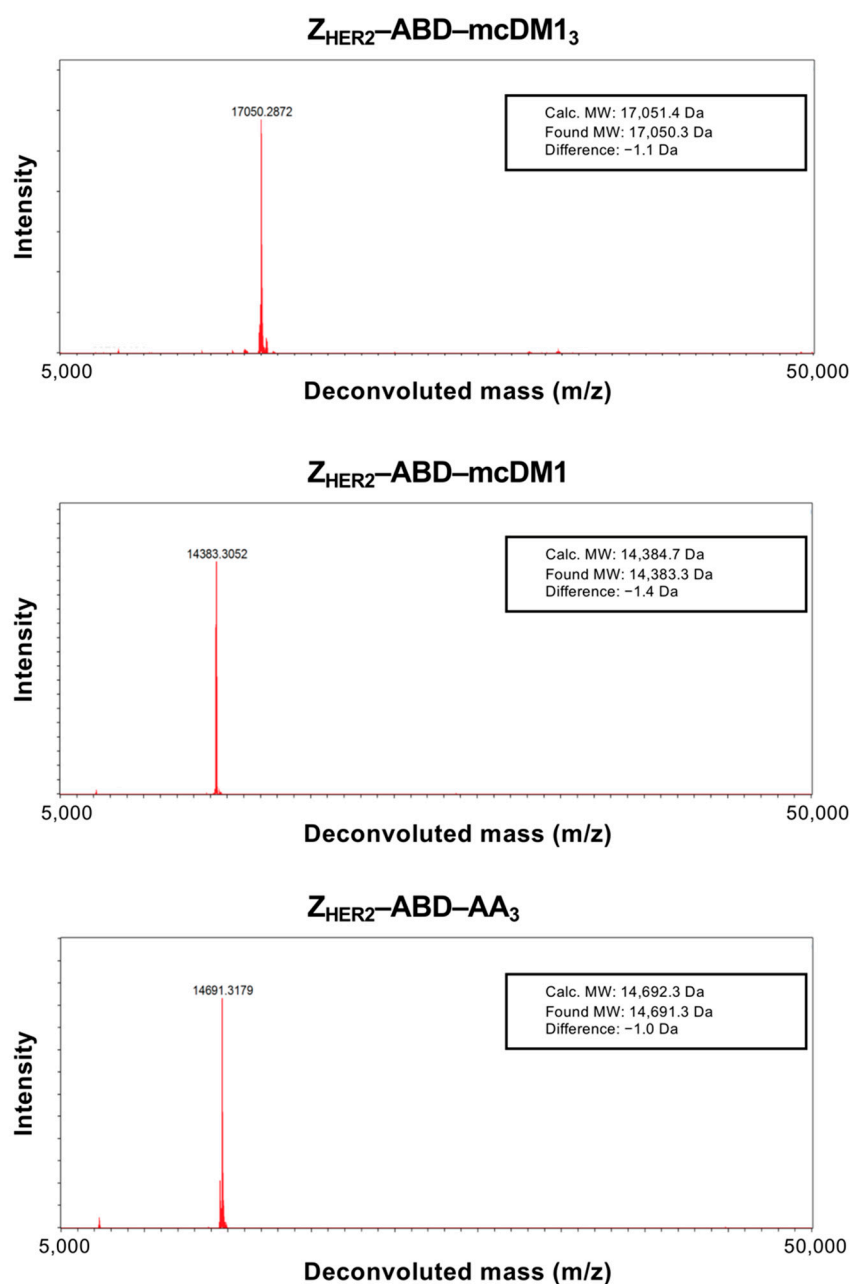

**Figure S1.** Determination of the molecular masses by ESI-TOF mass spectrometry. The theoretical MW (Calc. MW) and the Found MW of the conjugates are given in the inset, along with the difference between the two.
